# Supplementary material for: Effects of electrolyte concentration and synthesis methods of sulfur/carbon composites on the electrochemical performance in lithium–sulfur batteries
Source: Royal Society of Chemistry journal article supplement (doi:10.1039/c5ra08939e), 2015-01-01
Supplement: c5ra08939e1.pdf [file c5ra08939e1.pdf]

Electronic Supplementary Material (ESI) for RSC Advances.  
This journal is © The Royal Society of Chemistry 2015

## **Supplementary Information**

# **Effects of electrolyte concentration and synthesis methods of sulfur/carbon composites on the electrochemical performance in lithium-sulfur batteries**

Guochun Li, Wen Zhao, Liang Liu\*, Long Chen  
Automotive Engineering Research Institute, Jiangsu University, Zhenjiang 212013,  
China

\*Corresponding author. Tel./Fax: +86 511 88782845. E-mail address:  
[lliu@mail.ujs.edu.cn](mailto:lliu@mail.ujs.edu.cn)

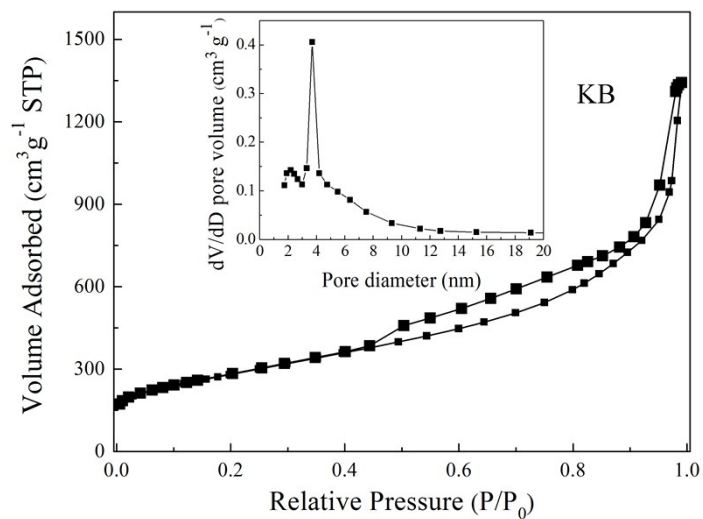

**Figure S1** Nitrogen adsorption-desorption isotherms and the pore size distribution curve (the inset) of KB.

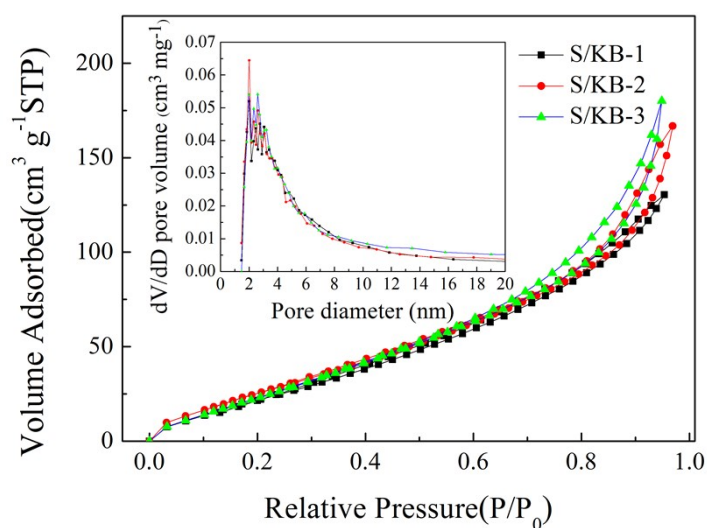

**Figure S2** Nitrogen adsorption-desorption isotherms of S/KB-1, S/KB-2, and S/KB-3 composites.

Isotherms combined with hysteresis curve, presented in Fig. S1-S2, reflect the mesoporous structure of the carbon matrix and S/KB composites.

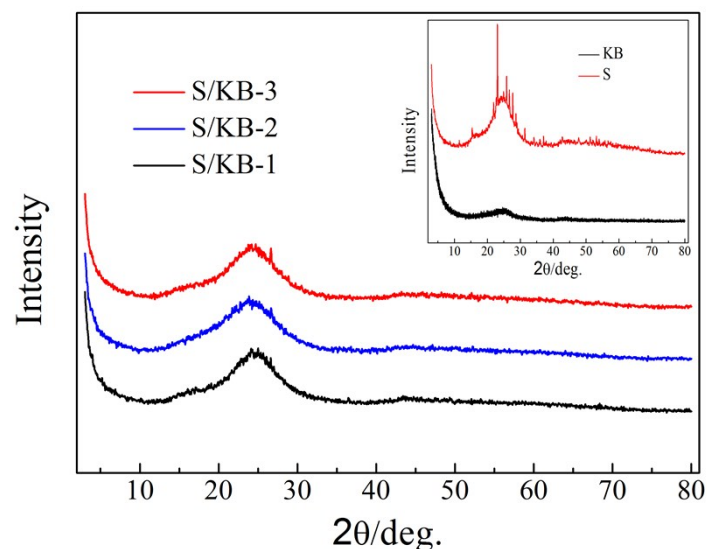

**Figure S3** XRD patterns of KB, sulfur powder (the inset), and S/KB-1, S/KB-2, and S/KB-3 composites.

The image in Fig. S3 shows the XRD patterns of KB, sulfur powder, and the as-prepared S/KB composites. For S/KB-1, one broad diffraction peak located at around  $24^\circ$  can be observed, which is highly similar to the characteristic peaks of KB, indicating elemental sulfur with amorphous structure in the composite. Heat treatment at  $155^\circ\text{C}$  is believed to enable sulfur to melt and diffuse into the pores of the carbon matrix, which is due to the lowest viscosity of sulfur at this temperature.<sup>1,2</sup> When the temperature was increased to  $300^\circ\text{C}$ , residual sulfur on the surface of KB sublimed or is re-absorbed into the pores of the carbon matrix, resulting in a highly dispersed state of sulfur and carbon in S/KB-1. No characteristic peaks of crystalline sulfur can be observed in S/KB-2, indicating that sulfur with crystalline state in the sulfur-carbon mixture can also be transformed into amorphous state by ball-milling method. However, when the composite was heated to  $155^\circ\text{C}$ , weak characteristic peaks of crystalline sulfur can be detected, suggesting that a small amount of amorphous sulphur is recrystallized onto the external surface of carbon black after cooling down to room temperature.

1. X. L. Ji, K. T. Lee and L.F. Nazar, *Nat. Mater.*, 2009, **8**, 500-506.
2. B. Zhang, X. Qin, G. R. Li and X. P. Gao, *Energy Environ. Sci.*, 2010, **3**, 1531-1537.
